# Supplementary material for: Are minimal residual disease measurement after consolidation therapy useful in children with acute lymphoblastic leukemia?
Source: Research Square preprint supplement (doi:10.21203/rs.3.rs-3411409/v1), 2023-10-10
Supplement: Supplementary file 1 [file bedaf18ba3c7db4c1fa9c02f.docx]

**Table 1. Patient characteristics by availability of MRD**

Abbreviations: WBC= white blood cell; RFS = Relapse-free survival.
For comparison of RFS a log-rank test was used.

* CNS1/2/TLP- versus CNS3/TLP+

** pos versus neg
